# Supplementary material for: Milk Metabolomics Data Reveal the Energy Balance of Individual Dairy Cows in Early Lactation
Source: PubMed Central journal article supplement (PMC6202381; doi:10.1038/s41598-018-34190-4), 2018-10-25

1 Milk Metabolomics Data Reveal the Energy Balance of Individual Dairy Cows in Early

2 Lactation

3 Wei Xu<sup>1,2</sup>, Jacques Vervoort<sup>2\*</sup>, Edoardo Saccenti<sup>3</sup>, Renny van Hoeij<sup>1</sup>, Bas Kemp<sup>1</sup> & Ariette van Knegsel<sup>1\*</sup>

4 *1. Adaptation Physiology Group, Department of Animal Sciences, 2. Laboratory of Biochemistry, 3. Laboratory*  
5 *of Systems and Synthetic Biology, Wageningen University & Research, Wageningen, the Netherlands*

6

7 \* Corresponding author. Email: [jacques.vervoort@wur.nl](mailto:jacques.vervoort@wur.nl); [ariette.vanknegsel@wur.nl](mailto:ariette.vanknegsel@wur.nl)

8

9

10

## Principal Component Analyse

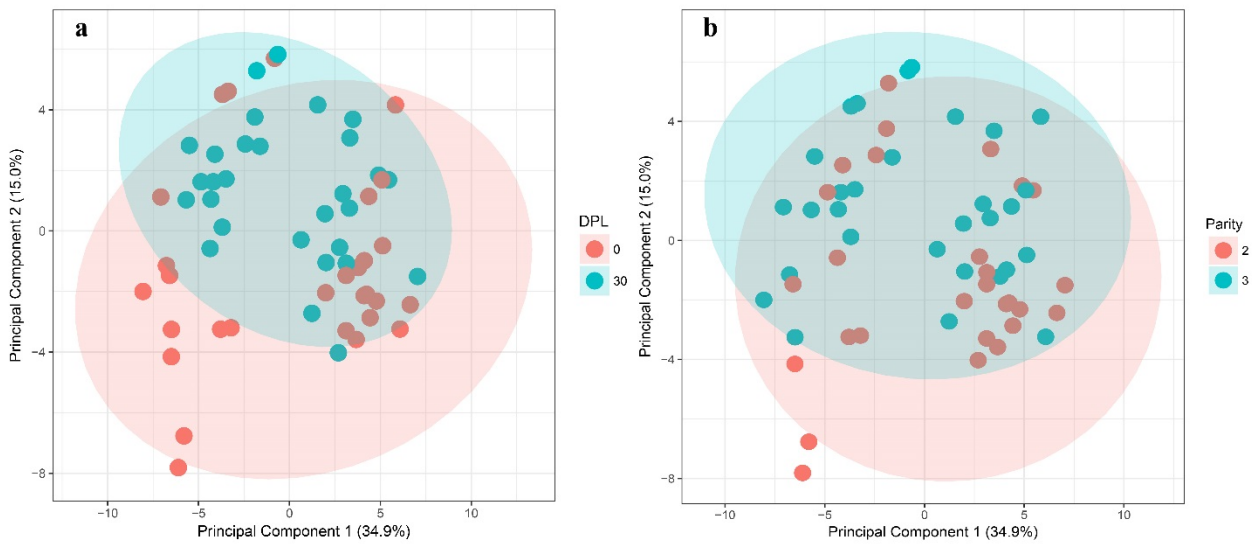

- 11 |Supplementary Fig. S1. Principal component analyses to identify metatypes, data were labelled with different  
12 | dry period length (a) and parity (b).

13 Supplementary Fig. S2. Pearson correlations matrix among milk metabolites, milk production traits and energy  
14 balance of dairy cows in week 2 (a) and week 7 (b). Blank represents the *P*-value of correlation between two  
15 variables is insignificant (*P*-value > 0.05).

16 Abbreviation: cAMP, adenosine 3,5-cyclic monophosphate; AMP, adenosine monophosphate; CMP, cytidine monophosphate; FMN, Flavin  
17 mononucleotide; FPCM, fat- and protein-corrected milk production.

18

Fig. S2-a

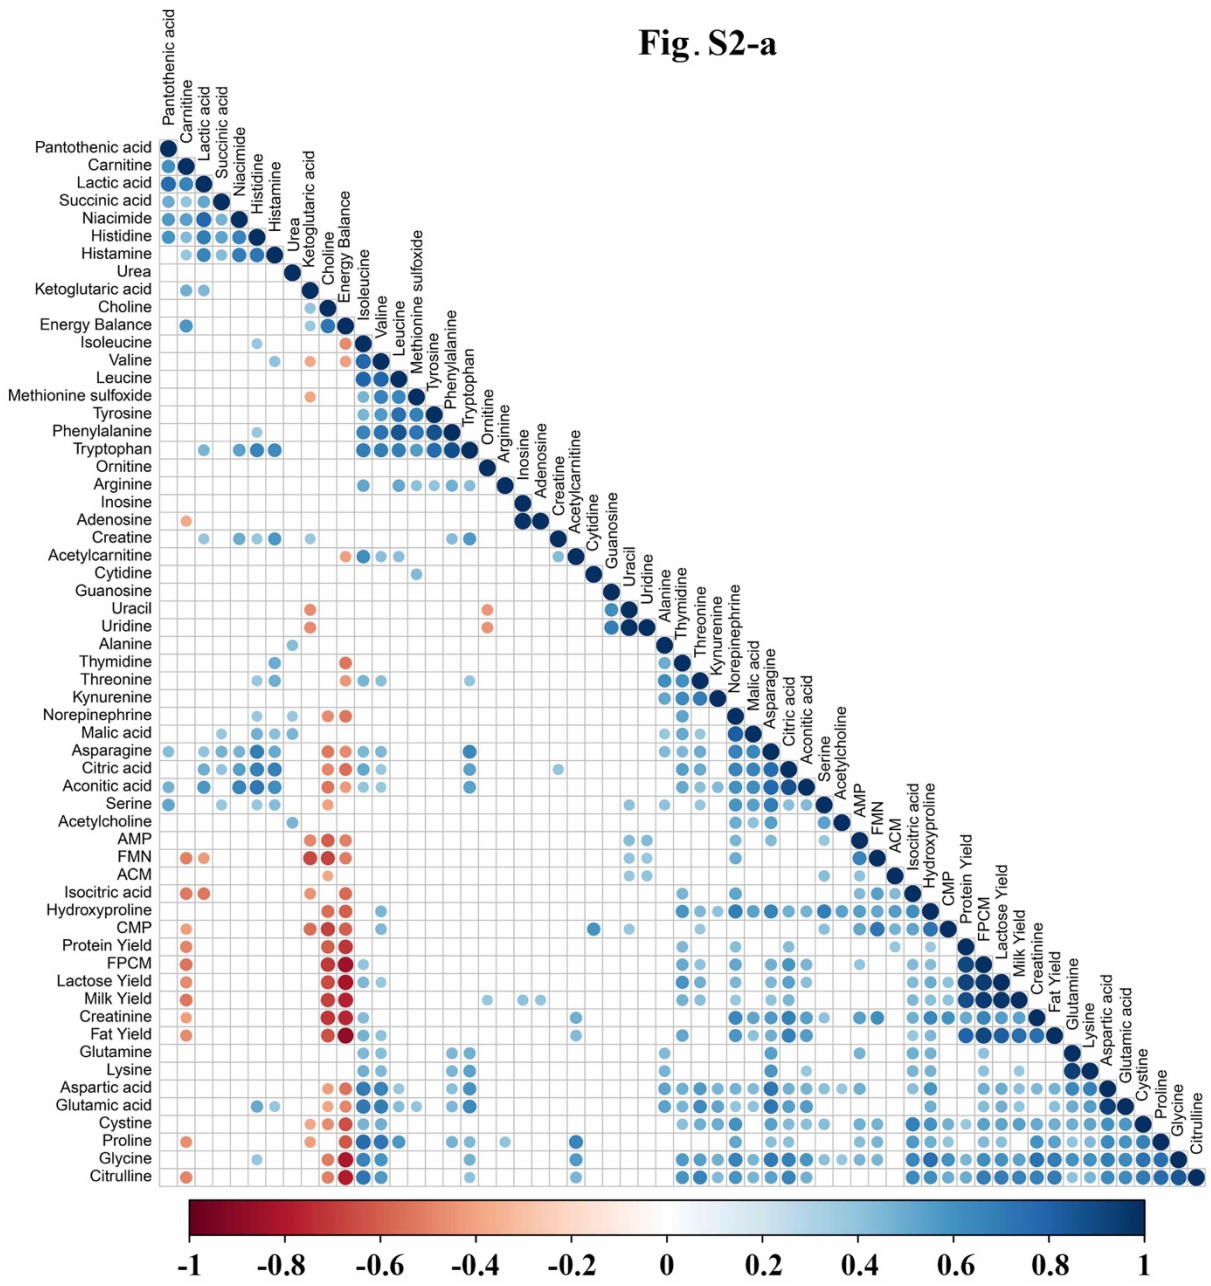

Fig. S2-b

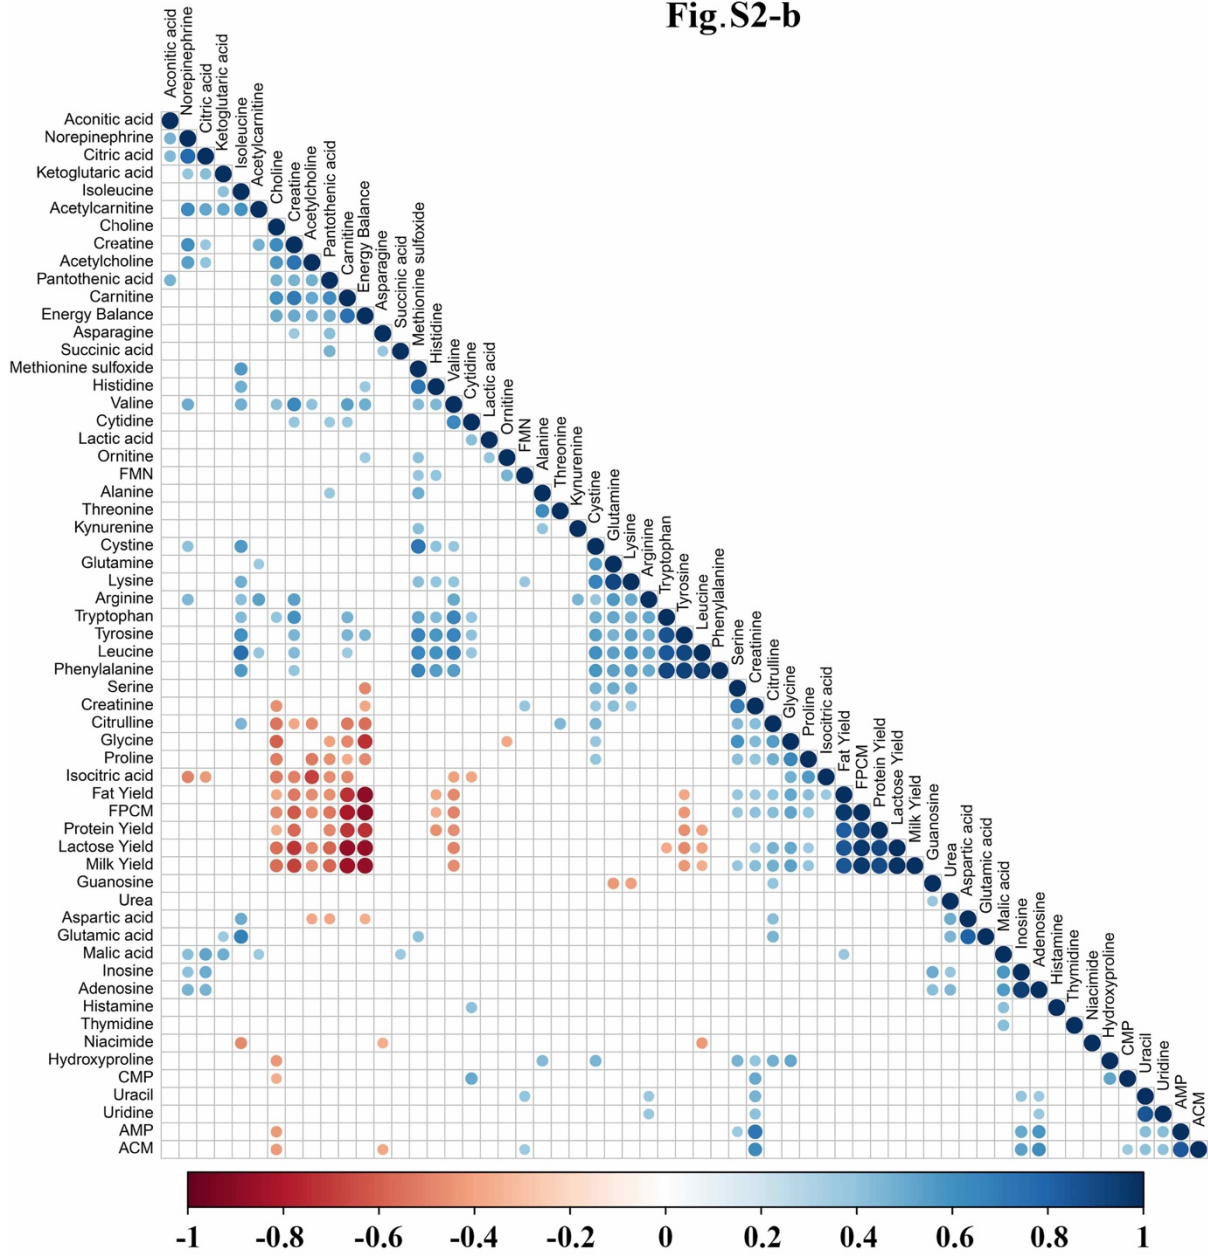

23 Supplementary Fig. S3. The effect of significant two-way interaction between energy balance (EB) and different  
 24 treatments, including dry period (DPL) and parity on in week 2 glycine (A-1, A-2, A-3), Creatinine (B), Choline  
 25 (C), adenosine 3,5-cyclic monophosphate (cAMP) (D), Hydroxyproline (E), citric acid (F), milk yield (G), lactose  
 26 (H), fat yield (I-1, I-2), protein (J-1, J-2), FPCM (K-1, K-2).

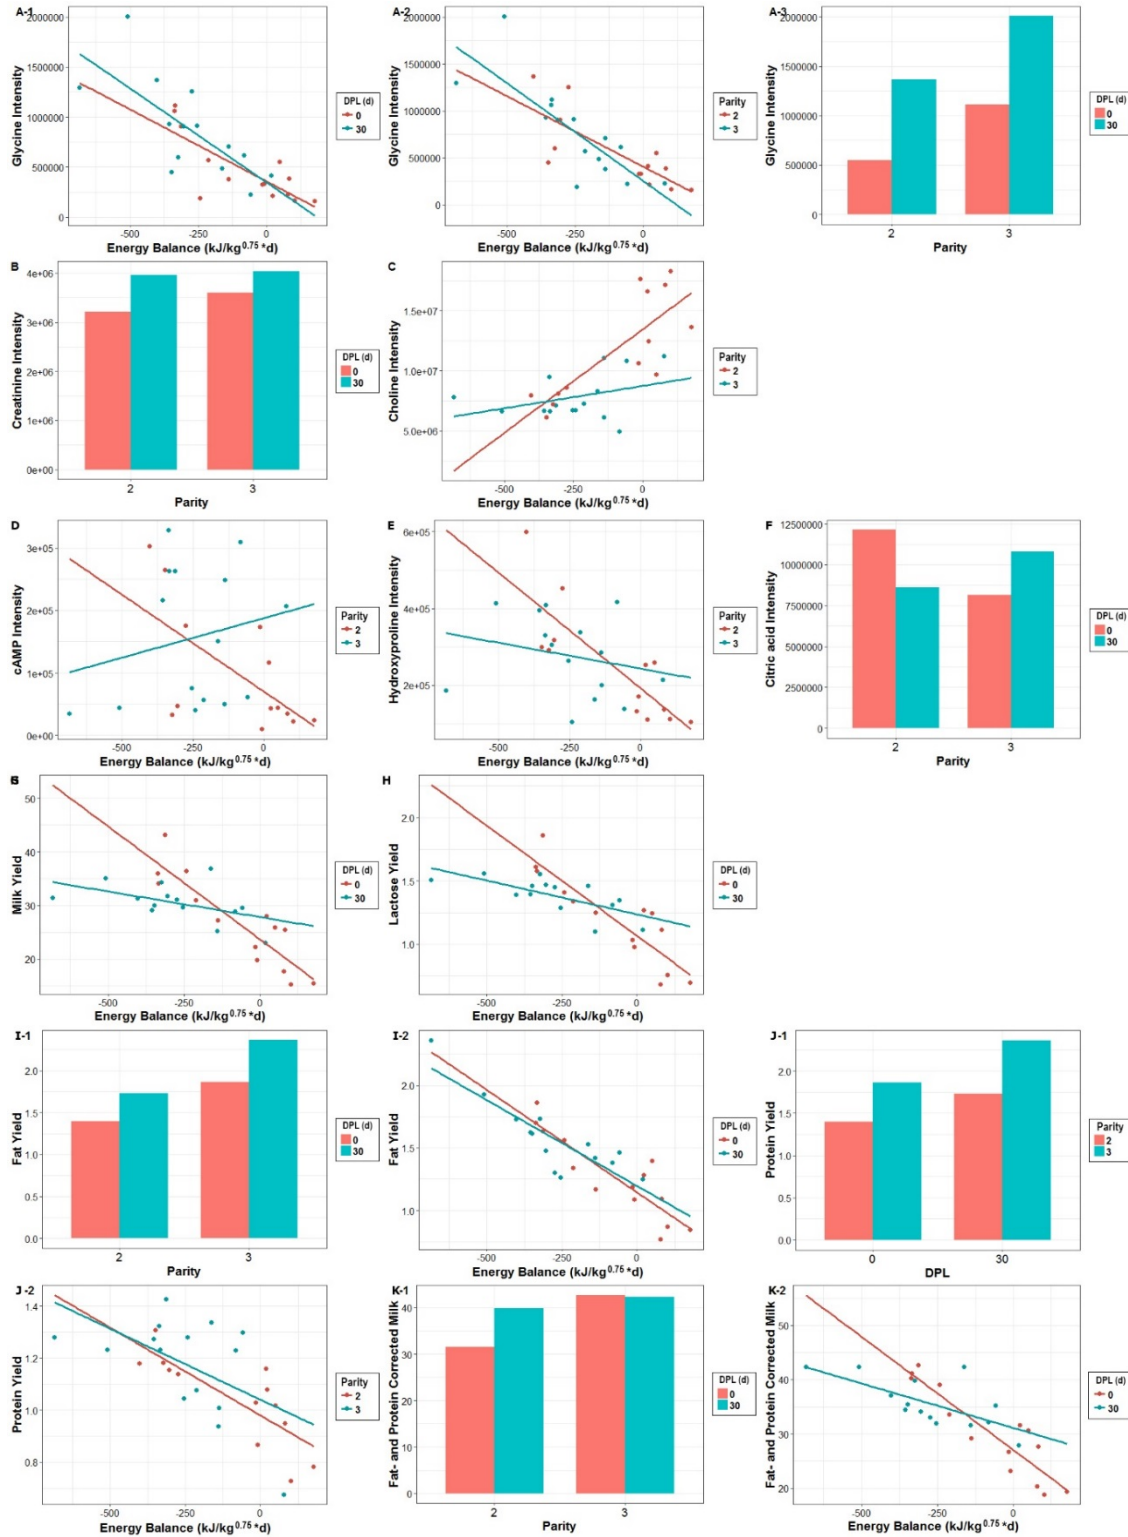

Supplementary Fig. S4. The effect of significant two-way interaction between EB and different treatments, including dry period (DP) and parity in week 7 on glycine (A-1, A-2), Citrulline (B-1, B-2), Tyrosine (C-1, C-2, C-3), lactose (D), protein (E), FPCM (F).

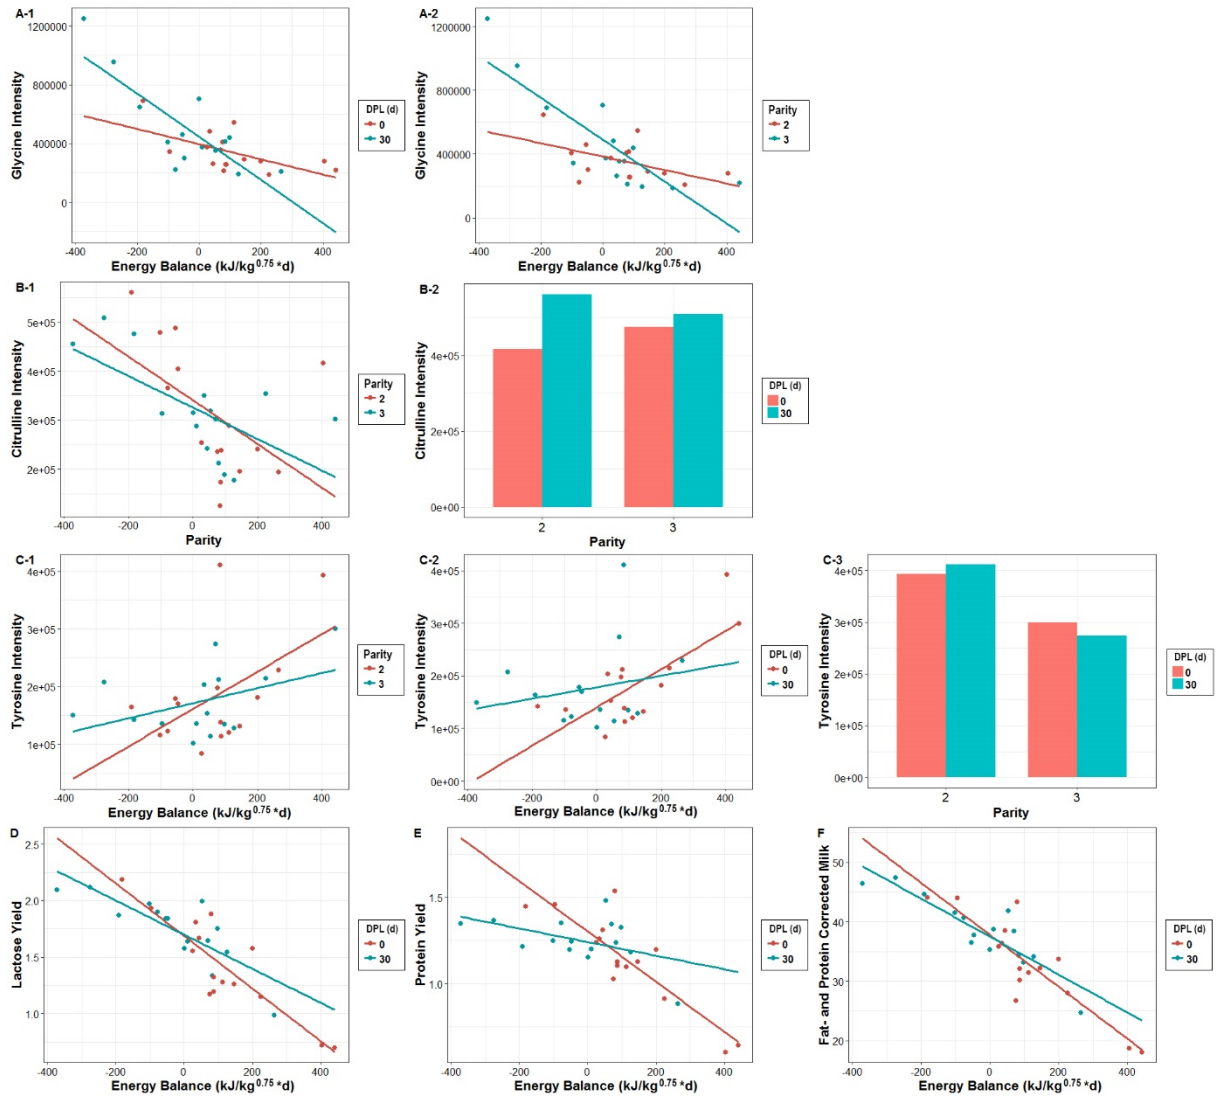

Supplement: 41598_2018_34190_MOESM1_ESM.pdf [file 41598_2018_34190_MOESM1_ESM.pdf]
